# Supplementary material for: Ultraviolet fluorescence discovered in New World flying squirrels (Glaucomys)
Source: Oxford University Press journal article supplement (doi:10.1093/jmammal/gyy177), 2018-12-20
Supplement: gyy177_suppl_supplementary_data_sd1.docx [file gyy177_suppl_supplementary_data_sd1.docx]

December 17 2018

**Supplementary Data**

Specimens Examined

**SD1.—**List of museum specimens (including sex, locality, and date of collection) from the Field Museum of Natural History, Chicago, IL, USA (FMNH) and the Science Museum of Minnesota, St. Paul, MN, USA (SMM) photographed and analyzed for UV fluorescence:

*Glaucomys oregonensis*.— FMNH 13950: ♀, OR, USA, 12/17/1896; FMNH 51510: ♂, OR, USA, 01/17/1935; FMNH 5904: ♂, WA, USA, 09/11/1898; FMNH 5905: ♂, WA, USA, 08/28/1898; FMNH 51509: ♀, OR, USA, 08/18/1929; FMNH 9078: ♀, OR, USA, 09/21/1901; SMM unknown specimen number: unknown sex, OR, USA, unknown date; SMM unknown specimen number: unknown sex, OR, USA, unknown date.

*Glaucomys sabrinus*.— FMNH 6482: ♀, ON, Canada, 02/04/1899; FMNH 6483: ♀, ON, Canada, 01/08/1899; FMNH 7662: ♂, MB, Canada, 02/3/1901; FMNH 7664: ♀, MB, Canada, 02/2/1901; FMNH 8190: ♀, BC, Canada, 11/20/1900; FMNH 23643: ♂, MT, USA, 09/28/1924; FMNH 23644: ♂, MT, USA, 09/29/1924; FMNH 34122: ♀, BC, Canada, 06/01/1894; FMNH 34123: unknown sex; BC, Canada, 12/13/1895; FMNH 90936: ♀, ID, USA, 03/5/1939; FMNH 90937: ♂, ID, USA, 03/14/1939; FMNH 199900: ♂, VT, USA, 11/18/1939; FMNH 199901: ♀, VT, USA, 12/28/1934; FMNH 199902: ♂, MA, USA, 10/21/1936; SMM Z 89:11:9: ♀, MN, USA, 09/13/1989; SMM Z 89:11:12: ♂, MN, USA, 09/23/1989; SMM Z 89:11:13: ♂, MN, USA, 10/01/1989; SMM Z 89:11:13: ♂, MN, USA, 10/01/1989; SMM Z 89:11:14: ♀, MN, USA, 09/23/1989; SMM Z 89:11:19:♂, MN, USA, 09/13/1989; SMM Z 89:11:20: ♂, MN, USA, 09/13/1989; SMM Z 89:11:22: ♂, MN, USA, 09/09/1989; SMM Z 89:11:24: ♂, MN, USA, 09/24/1989; SMM Z 89:11:25: ♀, MN, USA, 07/28/1989; SMM Z 89:11:26: ♀, MN, USA, 07/28/1989; SMM Z 91:9:12: ♂, MN, USA, 09/26/1991; SMM Z 92:11:25: ♂, MN, USA, 09/14/1992; SMM Z 92:11:26: ♂, MN, USA, 09/19/1992; SMM Z 93:14:39: ♀, MN, USA, 09/10/1995; SMM Z 93:8:15: ♀, MN, USA, 09/14/1993; SMM Z 93:8:17: ♂, MN , USA, 09/24/1993; SMM Z 93:8:19: ♂, MN, USA, 09/11/1993; SMM Z 93:8:20: ♀, MN, USA, 09/16/1993; SMM Z 94:6:1: unknown sex, MN, USA, 09/20/1994; SMM Z 94:6:2: ♂, MN, USA, 09/22/1994; SMM Z 94:6:3: unknown sex, MN, USA, 09/23/1994; SMM Z 94:6:5: ♂, MN, USA, 09/12/1994; SMM Z 95:14:22: ♀, MN, USA, 09/11/1995; SMM Z 95:14:23: ♀, MN, USA, 09/15/1995; SMM Z 95:14:30: ♀, MN, USA, 09/12/1995; SMM Z 95:14:31: ♀, MN, USA, 09/17/1995; SMM Z 95:14:32: ♀, MN, USA, 09/12/1995; SMM Z 95:14:33: ♀, MN, USA, 09/17/1995; SMM Z 95:14:37: ♂, MN, USA, 09/11/1995; SMM Z 95:14:38: ♂, MN, USA, 09/10/1995; SMM Z 96:7:1: ♂, MN, USA, 09/17/1996; SMM Z 89:11:8: ♀, MN, USA, 09/01/1989; SMM Z 89:11:10: ♀, MN, USA, 09/15/1989; SMM Z 89:11:60: ♂, MN, USA, 09/11/1989; SMM Z 89:17:25: ♀, MN, USA, 08/12/1989; SMM Z 90:4:9: ♀, MN, USA, 09/09/1990; SMM Z 90:4:10: ♀, MN, USA, 09/11/1990; SMM Z 90:4:11: ♀, MN, USA, 09/16/1990; SMM Z 90:4:12: ♀, MN, USA, 09/20/1990; SMM Z 90:4:13: ♀, MN, USA, 09/22/1990; SMM Z 90:4:14: ♂, MN, USA, 09/26/1990; SMM Z 91:9:13: ♂, MN, USA, 09/11/1991; SMM Z 91:9:14: ♀, MN, USA, 09/11/1991; SMM Z 91:9:16: ♂, MN, USA, 09/24/1991; SMM Z 92:11:1: ♀, MN, USA, 09/14/1992; SMM Z 92:11:27: ♂, MN, USA, 09/23/1992; SMM Z 92:11:28: ♂, MN, USA, 09/23/1992; SMM Z 92:11:30: ♂, MN, USA, 09/15/1992; SMM Z 93:8:1, ♀, MN, USA, 09/20/1993; SMM Z 93:8:2: ♀, MN, USA, 09/17/1993; SMM Z 93:8:4: ♂, MN, USA, 09/23/1993; SMM Z 93:8:16: ♀, MN, USA, 09/15/1993; SMM Z 94:5:97: unknown sex, MN, USA, 09/19/1994; SMM Z 94:6:4: ♀, MN, USA, 09/11/1994; SMM Z 95:14:21: ♀, MN, USA, 09/12/1995; SMM Z 95:14:24: ♂, MN, USA, 09/16/1995; SMM Z 96:7:6: ♀, MN, USA, 09/09/1996; SMM Z 96:7:8: ♂, MN, USA, 09/16/1996; SMM Z 97:10:2: ♀, MN, USA, 09/17/1997; SMM Z 98:3:1: ♂, MN, USA, 09/12/1998.

*Glaucomys volans*.— FMNH 4755: ♀, OH, USA, 10/03/1889; FMNH 4756: ♀, NC, USA, 12/16/1887; FMNH 4757: ♂, NY, USA, 01/08/1898; FMNH 5567: ♀, IA, USA, unknown date; FMNH 5792: ♀, WV, USA, 12/13/1897; FMNH 7721: ♂, FL, USA, 04/02/1900; FMNH 7722: ♀, FL, USA, 04/02/1900; FMNH: 7726, ♀, SC, USA, 12/01/1899; FMNH 7727: ♂, SC, USA, unknown date; FMNH 7730: ♀, GA, USA, 01/11/1901; FMNH 15706: ♀, IL, USA, 04/12/1907; FMNH 41762: ♂, Chimaltenango, Guatemala, 01/31/1934; FMNH 41763: ♀, Chimaltenango, Guatemala, 02/03/1934; FMNH 64179: ♂, Chiapas, Mexico, 04/02/1947; FMNH 64180: ♀, Chiapas, Mexico, 04/13/1947; FMNH 64181: ♀, Chiapas, Mexico, 04/14/1947; FMNH 64182: ♀, Chiapas, Mexico, 04/14/1947; FMNH 64183: ♂, Chiapas, Mexico, 04/17/1947; FMNH 64184: ♀, Chiapas, Mexico, 04/20/1947; FMNH 90933: ♀, TN, USA, 08/22/1940; FMNH 90935: ♂, NC, USA, 12/18/1939; FMNH 105785: ♂, MI, USA, 10/19/1970; FMNH 123088: ♀, MI, USA, unknown date; FMNH 152088: ♂, IL, USA, unknown date; SMM Z 95:8:8: ♀, WI, USA, 10/01/2006; SMM Z 99:4: ♀, MN, USA, 08/08/1999.

*Sciurus carolinensis*.— SMM Z 73:11:50: ♀, MN, 10/07/1973; SMM Z 73:11:53: ♀, MN, USA, 10/01/1968; SMM Z 73:11:54: ♀, MN, USA, 12/22/1979; SMM Z 79:1:287: ♀, MN, USA, 09/01/1977; SMM Z 79:1:302: ♂, MN, USA, 09/16/1971; SMM Z 79:1:302: ♀, MN, USA, 12/22/1979; SMM Z 80:1:27: ♀, MN, USA, 11/13/1973; SMM Z 83:11:18: ♂, MN, USA, 06/01/1905; SMM Z 92:13:12: ♂, MN, USA, 11/14/1992; SMM Z 92:13:8: ♂, MN, USA, 02/02/1992.

*Sciurus niger*.— SMM Z 78:1:82: ♂, MN, USA, 06/10/1978; SMM Z 83:18:13: ♀, MN, USA, 05/16/1968; SMM Z 91:12:191: ♀, MN, USA, 08/15/1991; SMM Z 92:13:11: ♂, MN, USA, 11/07/1992; SMM unknown specimen number: ♀, MN, USA, 03/01/2001.

*Tamiasciurus hudsonicus*.— SMM Z 74:2:181: ♀, AK, USA, 07/09/1974; SMM Z 78:1:128: ♂, MN, USA, 10/21/1996; SMM Z 79:1:275: ♀, MN, USA, 04/23/1979; SMM Z 83:37:5: ♂, OH, USA, 07/30/1982; SMM Z 87:6:10: ♂, MN, USA, 09/13/1987; SMM Z 89:17:56: ♂, MN, USA, 08/12/1989; SMM Z 89:17:57: ♂, MN, USA, 08/12/1989; SMM Z 94:17:202: ♀, MN, USA, 10/19/1999; SMM Z 94:17:204: ♂, MN, USA, 04/19/1994; SMM Z 94:17:209: ♀, MN, USA, 10/29/1994; SMM Z 96:14:13: ♀, MN, USA, 10/05/1996.
